# Supplementary material
Source: PubMed Central journal article supplement (PMC8715144)
Supplement: mmc1.pdf [file mmc1.pdf]

The American Journal of Human Genetics, Volume 108

## Supplemental information

### **Closing the gap: Systematic integration of multiplexed functional data resolves variants of uncertain significance in *BRCA1*, *TP53*, and *PTEN***

**Shawn Fayer, Carrie Horton, Jennifer N. Dines, Alan F. Rubin, Marcy E. Richardson, Kelly McGoldrick, Felicia Hernandez, Tina Pesaran, Rachid Karam, Brian H. Shirts, Douglas M. Fowler, and Lea M. Starita**

Figure S1:

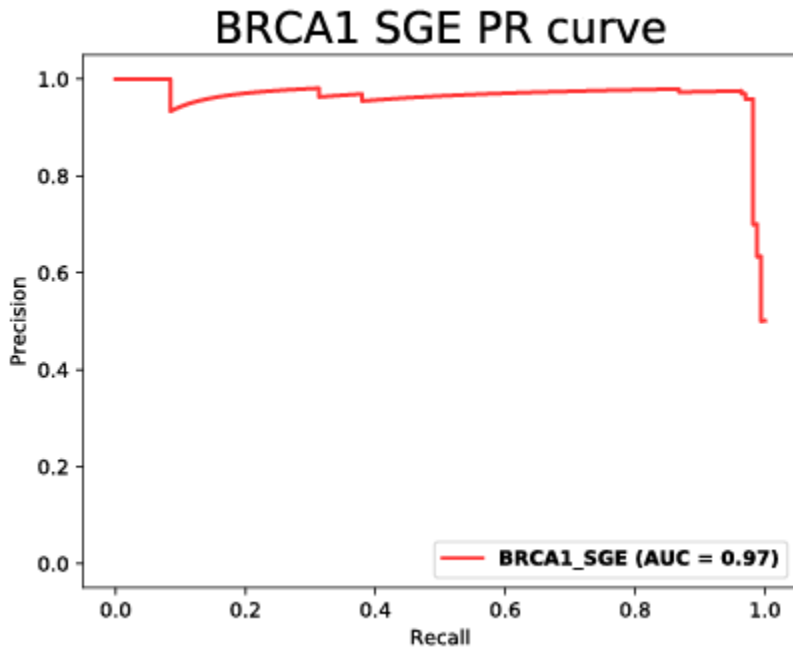

Figure S1 legend: precision recall curve for *BRCA1* MAVE data validated on all assayed variants with benign/likely benign and pathogenic/likely pathogenic interpretations in ClinVar.

Figure S2:

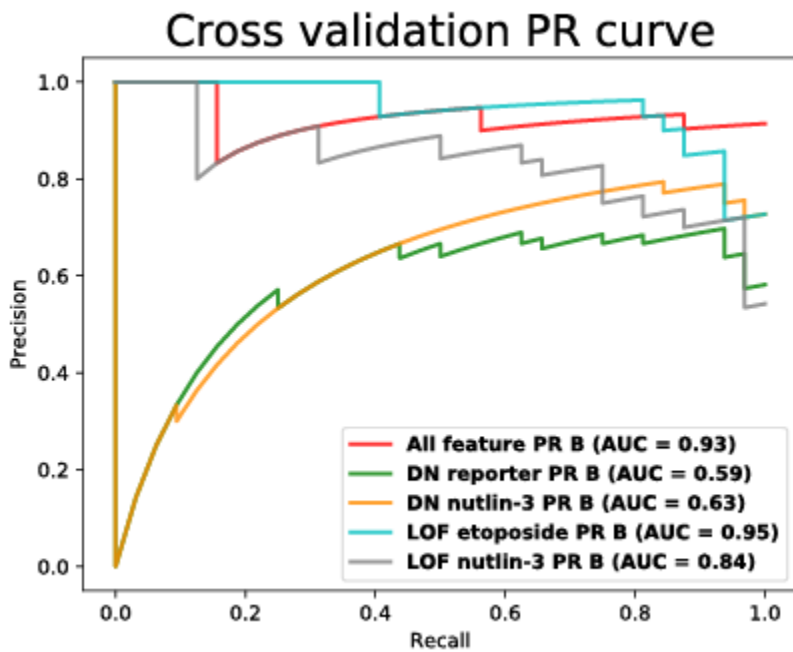

Figure S2 legend: precision recall curves for leave-one-out cross validation for *TP53* naive Bayes classifiers trained on all benign/likely benign and pathogenic/likely pathogenic variants in ClinVar. Classifiers were trained on either all four *TP53* MAVEs used in this analysis or each
